# Supplementary material for: Baseline circulating unswitched memory B cells and B-cell related soluble factors are associated with overall survival in patients with clear cell renal cell carcinoma treated with nivolumab within the NIVOREN GETUG-AFU 26 study
Source: HighWire-hosted journal article supplement (doi:10.1136/jitc-2022-004885), 2022-05-01
Supplement: jitc-2022-004885supp001_data_supplement.pdf [file jitc-2022-004885supp001_data_supplement.pdf]

SUPPLEMENTARY MATERIALS:

Supplementary Methods:

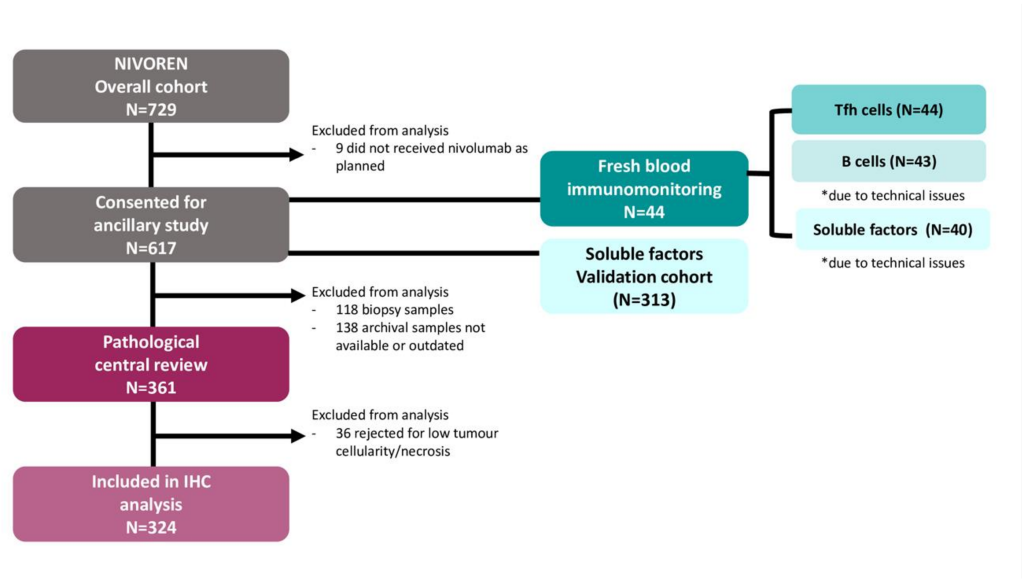

Supplementary Figure S1. NIVOREN translational study flowchart.

Sample processing

Blood samples were collected in heparinized tubes for fresh whole blood immune phenotyping and plasma banking. For plasma banking, samples were centrifuged at 800 *g* for 10 minutes and stored at −80°C until analysis. After thawing, a second centrifugation was performed at 10 000 x *g* for 10 minutes at 2–8°C to remove platelets before conducting cytokine, soluble factors, and growth factors dosage.

## **Fresh whole blood immunophenotyping**

Immune phenotyping was realized at the Laboratory of Immunomonitoring in Oncology (L.I.O.) of the Gustave Roussy Cancer Campus.

To avoid the loss or reduction or phenotype modifications due to the process of freezing/thawing and to reduce technical manipulations and the blood sampling needed to perform the tests, we performed fresh whole blood immune cell phenotyping. To ensure feasibility and reproducibility for use in longitudinal clinical studies, we designed and optimized the marker and dye selections of 6 10-colors flow cytometry panels to use in clinical research studies as previously described (39): Numeration, B cells, Polarization, Activation, Treg Phenotype and MDSC panels, described in the supplementary table S1.

For surface staining on blood, fresh whole blood (100 µl) was incubated for 20 min at room temperature in the dark with liquid antibodies or in Duraclone® tubes. Erythrocytes lysis was performed adding 1 ml of Versalyse™ (Beckman) containing 25 µl of Fixative Solution (Beckman) for liquid antibodies and 2 ml of Versalyse containing 50 µl of Fixative Solution for Duraclone® tubes. After vortex, tubes were incubated for 20 min at room temperature in the dark. After adding 2 ml of phosphate-buffered saline (PBS) 1X, tubes were centrifuged 5 min at 500g, cells were resuspended in 3 ml of 1X PBS and centrifuged again. The pellet was resuspended in 250 µl of 1X PBS and tubes were analyzed on a Gallios™ flow cytometer (Beckman, 10 colors, 3 lasers).

**Supplementary Table S1.** Flow cytometry panels.

| Target –<br>Fluorochrome | Provider           | Clone  | Reference | Dilution | Panel                    |
|--------------------------|--------------------|--------|-----------|----------|--------------------------|
| <b>CD16 – FITC</b>       | Beckman<br>Coulter | 3G8    | B49215    | 1/10     | Numeration               |
| <b>CD56 – PE</b>         | Beckman<br>Coulter | N901   | A07788    | 1:10     | Numeration<br>Activation |
| <b>CD19 – ECD</b>        | Beckman<br>Coulter | J3-119 | A07770    | 1/20     | Numeration               |
| <b>CD244 – PC5,5</b>     | Beckman<br>Coulter | C1.7   | B21171    | 1/40     | Numeration<br>MDSC       |
| <b>CD14 – PC7</b>        | Beckman<br>Coulter | RMO52  | A22331    | 1/50     | Numeration               |
| <b>CD8 APC</b>           | Beckman<br>Coulter | B9.11  | IM2469    | 1/50     | Numeration               |
| <b>CD4 AA700</b>         | Beckman<br>Coulter | 13B8.2 | B10824    | 1/50     | Numeration               |
| <b>CD3 AA750</b>         | Beckman<br>Coulter | UCHT1  | A94680    | 1/100    | Numeration               |
| <b>CD15 PB</b>           | Beckman<br>Coulter | ASR    | A74775    | 1/10     | Numeration<br>MDSC       |
| <b>CD45 KrO</b>          | Beckman<br>Coulter | J33    | B36294    | 1/20     | Numeration               |
| <b>CD57 FITC</b>         | Beckman<br>Coulter | NC1    | IM0466U   | 1/10     | Activation               |
| <b>CD160 – PE</b>        | Beckman<br>Coulter | BY55   | IM3657    | 1/10     | Activation               |

|                             |                    |           |         |      |                            |
|-----------------------------|--------------------|-----------|---------|------|----------------------------|
| <b>CD69 ECD</b>             | Beckman<br>Coulter | TP1.55.3  | 6607110 | 1/10 | Activation                 |
| <b>CD279 PC5,5</b>          | Beckman<br>Coulter | PD1 .3    | B36123  | 1/10 | Activation                 |
| <b>CD137 PC7</b>            | Biolegend          | 4B4-1     | 309818  | 1/20 | Activation                 |
| <b>CD134 (OX40) – PC5,5</b> | Biolegend          | ACT35     | 350010  | 1:20 | Activation                 |
| <b>CD3 – AA700</b>          | Beckman<br>Coulter | UCHT1     | B10823  | 1:20 | Activation<br>Polarization |
| <b>CD5 – AA750</b>          | Beckman<br>Coulter | BL1a      | A78836  | 1/20 | Activation                 |
| <b>CD4 – PB</b>             | Beckman<br>Coulter | 13B8.2    | A82789  | 1/50 | Activation<br>Polarization |
| <b>CD8 – KrO</b>            | Beckman<br>Coulter | B9.11     | B00067  | 1/50 | Activation                 |
| <b>IgD – FITC</b>           | Beckman<br>Coulter | IA6-2     | B30652  | 1/50 | B cells                    |
| <b>CD10 – PE</b>            | Beckman<br>Coulter | ALB1      | A07760  | 1/10 | B cells                    |
| <b>CD5 – ECD</b>            | Beckman<br>Coulter | BL1a      | A33096  | 1/20 | B cells                    |
| <b>CD27 – PC5,5</b>         | Beckman<br>Coulter | 1A4CD27   | B21444  | 1/20 | B cells                    |
| <b>CD38 – PC7</b>           | Beckman<br>Coulter | LS198-4-3 | A54189  | 1/50 | B cells                    |
| <b>IgM – APC</b>            | Beckman<br>Coulter | SA-DA4    | B30654  | 1/50 | B cells                    |
| <b>CD19 – AA700</b>         | Beckman<br>Coulter | J3-119    | A07770  | 1/20 | B cells                    |
| <b>CD24 – AA750</b>         | Beckman<br>Coulter | ALB9      | B10738  | 1/50 | B cells                    |

|                        |                    |              |          |      |                 |
|------------------------|--------------------|--------------|----------|------|-----------------|
| <b>CD21 PB</b>         | Beckman<br>Coulter | BL13         | B09982   | 1/50 | B cells         |
| <b>CD32 KrO</b>        | Beckman<br>Coulter | 2E1          | B01177   | 1/20 | B cells<br>MDSC |
| <b>CXCR3 – FITC</b>    | Biolegend          | G025H7       | 353703   | 1:20 | Polarization    |
| <b>CCR10 – PE</b>      | R&D Systems        | 6588-5       | FAB3478P | 1:10 | Polarization    |
| <b>CCR7 – Dazzle</b>   | Biolegend          | G043H7       | 353236   | 1/20 | Polarization    |
| <b>CCR6 – PE-Cy5,5</b> | Biolegend          | G034E3       | 353405   | 1:10 | Polarization    |
| <b>CCR4 – PC7</b>      | Biolegend          | L291H4       | 359409   | 1:20 | Polarization    |
| <b>CXCR5 – APC</b>     | Biolegend          | J252D4       | 356907   | 1:20 | Polarization    |
| <b>CD45RA – AA750</b>  | Beckman<br>Coulter | 2H4LDH11LDB9 | A86050   | 1:20 | Polarization    |
| <b>CD161 – BV510</b>   | Biolegend          | HP-3G10      | 339922   | 1:20 | Polarization    |
| <b>CD33 – FITC</b>     | Biolegend          | HIM3-4       | 303304   | 1/20 | MDSC            |
| <b>HLA-DR – ECD</b>    | Beckman<br>Coulter | Immu-357     | IM3636   | 1/20 | MDSC            |
| <b>CD64 – PC7</b>      | Beckman<br>Coulter | 22           | B06025   | 1/20 | MDSC            |
| <b>CD11b APC</b>       | Beckman<br>Coulter | Bear1        | A87782   | 1/20 | MDSC            |
| <b>CD14 AA700</b>      | Beckman<br>Coulter | RMO52        | A99020   | 1/20 | MDSC            |
| <b>CD16 – AA750</b>    | Beckman<br>Coulter | 3G8          | A66330   | 1/50 | MDSC            |

### **Plasma cytokine and soluble proteins concentrations**

Cytokine and soluble proteins concentrations were measured in duplicate in plasma samples using the Meso-Scale Discovery (MSD) immunoassay (Rockville, MD, United States) according to the manufacturer's protocol. Eight different MSD kits were used for each plasma sample: "V-PLEX Human Proinflammatory Panel 1" to measure TNF-alpha, IFN-gamma, IL-6, IL-8 and IL-10, "V-PLEX Human Vascular Injury Panel 2" to measure VCAM-1, "V-PLEX Human Cytokine Panel 1" to measure IL-7 and VEGF, "V-PLEX Human Chemokine Panel 1" to measure MDC, "R-PLEX Human BCA-1/BLC/CXCL13 Assay" to measure BCA-1/CXCL13, "R-PLEX Human APRIL/TNFSF13 Assay" to measure APRIL, "R-PLEX Human 4-1BB/TNFRSF9 Assay" to measure 4-1BB and "U-PLEX Immuno-Oncology Assay" to measure BAFF and SDF-1alpha. Samples were measured using the MESO QuickPlex SQ120 and data, expressed in pg/ml of protein, were analyzed using the DISCOVERY WORKBENCH software (version 4.0). The lower limits of detection (LLOD) are described in Table S2.

**Supplementary Table S2.** Plasma cytokines and soluble factor's concentration.

| Target Cytokine / Soluble protein | Kit                                  | Catalog number | Sample dilution | LLOD       | Panel           |
|-----------------------------------|--------------------------------------|----------------|-----------------|------------|-----------------|
| <b>TNF-alpha</b>                  | V-PLEX Human Proinflammatory Panel 1 | N05049A-1      | 1:2             | 0,04 pg/ml | Proinflammatory |
| <b>IL-6</b>                       | V-PLEX Human Proinflammatory Panel 1 | N05049A-1      | 1:2             | 0,06 pg/ml | Proinflammatory |
| <b>IL-8</b>                       | V-PLEX Human Proinflammatory Panel 1 | N05049A-1      | 1:2             | 0,07 pg/ml | Proinflammatory |
| <b>IL-10</b>                      | V-PLEX Human Proinflammatory Panel 1 | N05049A-1      | 1:2             | 0,04 pg/ml | Proinflammatory |
| <b>IFN-gamma</b>                  | V-PLEX Human Proinflammatory Panel 1 | N05049A-1      | 1:2             | 0,37 pg/ml | Proinflammatory |
| <b>VEGF-A</b>                     | V-PLEX Human Cytokine Panel 1        | N05050A-1      | 1:2             | 1,12 pg/ml | Cytokine        |
| <b>IL-7</b>                       | V-PLEX Human Cytokine Panel 1        | N05050A-1      | 1:2             | 0,12 pg/ml | Cytokine        |
| <b>VCAM-1</b>                     | V-PLEX Human Vascular Injury Panel 2 | N45198B-1      | 1:1000          | 6,00 pg/ml | Vascular Injury |

| Target Cytokine / Soluble protein | Kit                            | Catalog number | Sample dilution | LLOD       | Panel           |
|-----------------------------------|--------------------------------|----------------|-----------------|------------|-----------------|
| <b>MDC</b>                        | V-PLEX Human Chemokine Panel 1 | N05047A-1      | 1:4             | 1,22 pg/ml | Chemokine       |
| <b>4-1BB</b>                      | R-PLEX Human 4-1BB/TNFRSF9     | L45SA-1        | 1:4             | 1,2pg/ml   | 4-1BB           |
| <b>APRIL</b>                      | R-PLEX Human APRIL/TNFSF13     | L45SA-1        | 1:32            | 87 pg/ml   | APRIL           |
| <b>BCA-1/CXCL13</b>               | R-PLEX Human BCA-1/BLC         | L45SA-1        | 1:2             | 1,0 pg/ml  | BCA-1/CXCL13    |
| <b>BAFF</b>                       | U-PLEX Immuno-Oncology         | N05227A-1      | 1:4             | 0,05 pg/ml | Immuno-Oncology |
| <b>SDF</b>                        | U-PLEX Immuno-Oncology         | N05227A-1      | 1:4             | 278 pg/ml  | Immuno-Oncology |

**Supplementary Results:**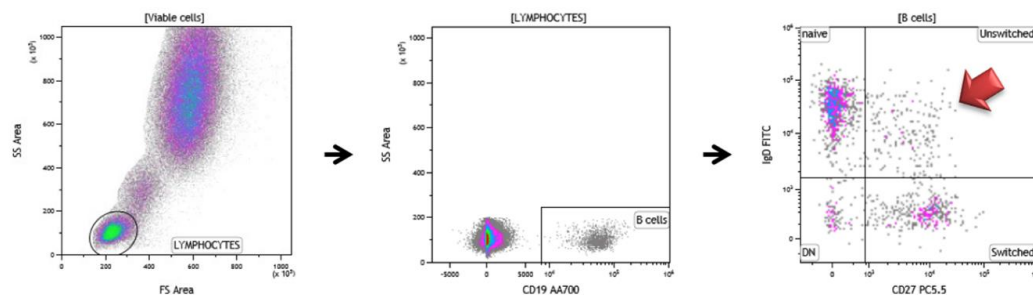

**Supplementary Figure S2.** Gating strategy for NSwM B cells (CD19+ CD27+ IgD+ IgM+) according to Pitoiset et al(39).

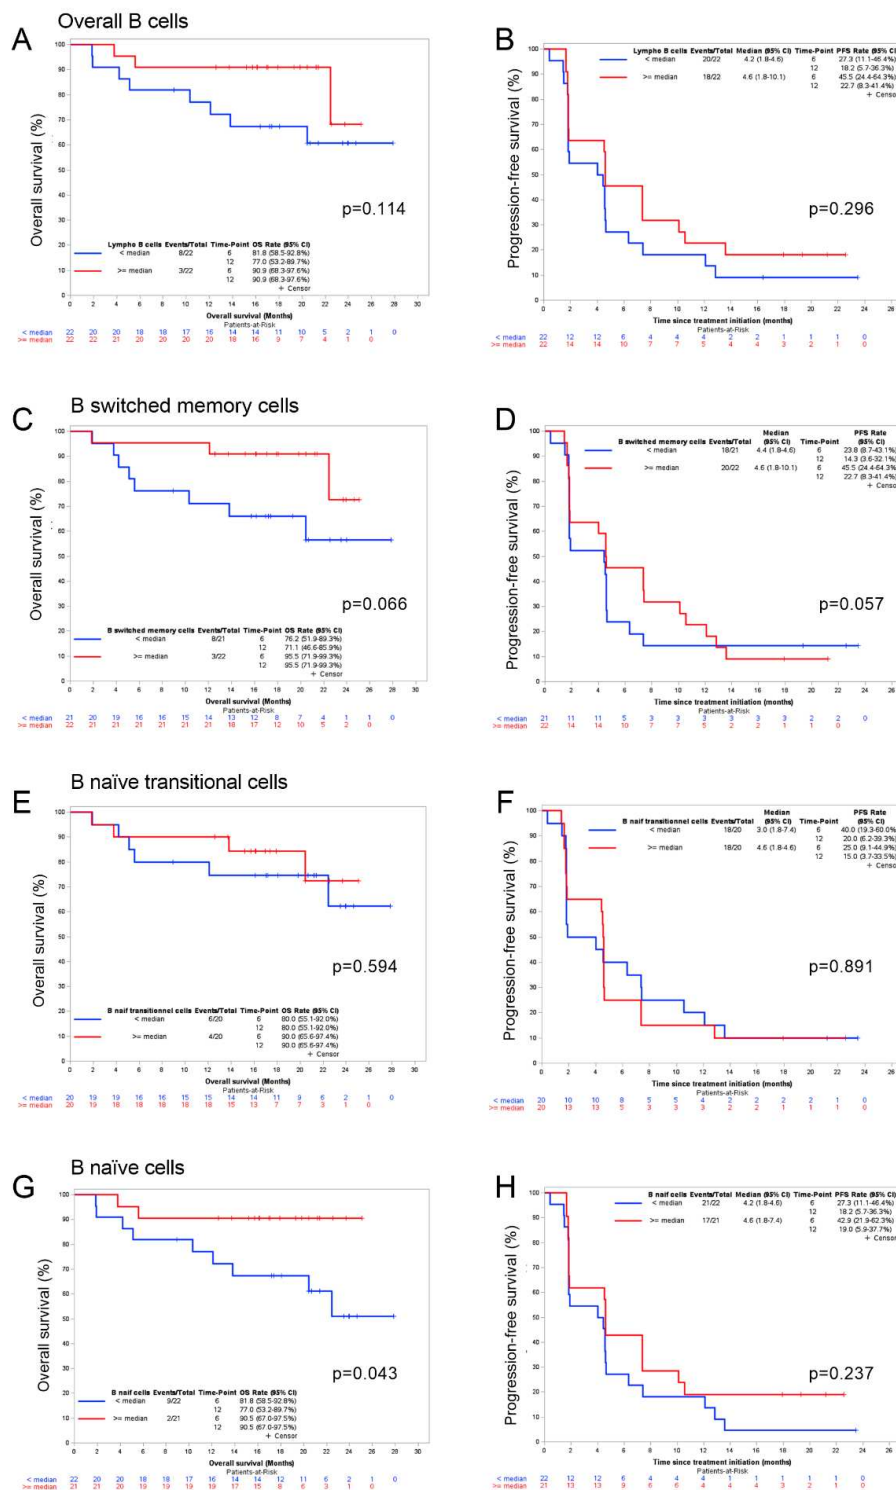

Supplementary Figure S3. (A-B), Kaplan-Meier for OS and PFS according to B cells concentration levels (high:  $\geq$ median; low:  $<$ median) in m-ccRCC patients treated with nivolumab. (C-D), Kaplan-Meier for OS and PFS according to SwM B cells concentration levels (high:  $\geq$ median; low:  $<$ median) in m-ccRCC patients treated with nivolumab. (E-F), Kaplan-Meier for OS and PFS according to naïve transitional B cells concentration levels (high:  $\geq$ median; low:  $<$ median) in mRCC patients treated with nivolumab. (G-H), Kaplan-Meier for OS and PFS according to naïve B cells concentration levels (high:  $\geq$ median; low:  $<$ median) in m-ccRCC patients treated with nivolumab.

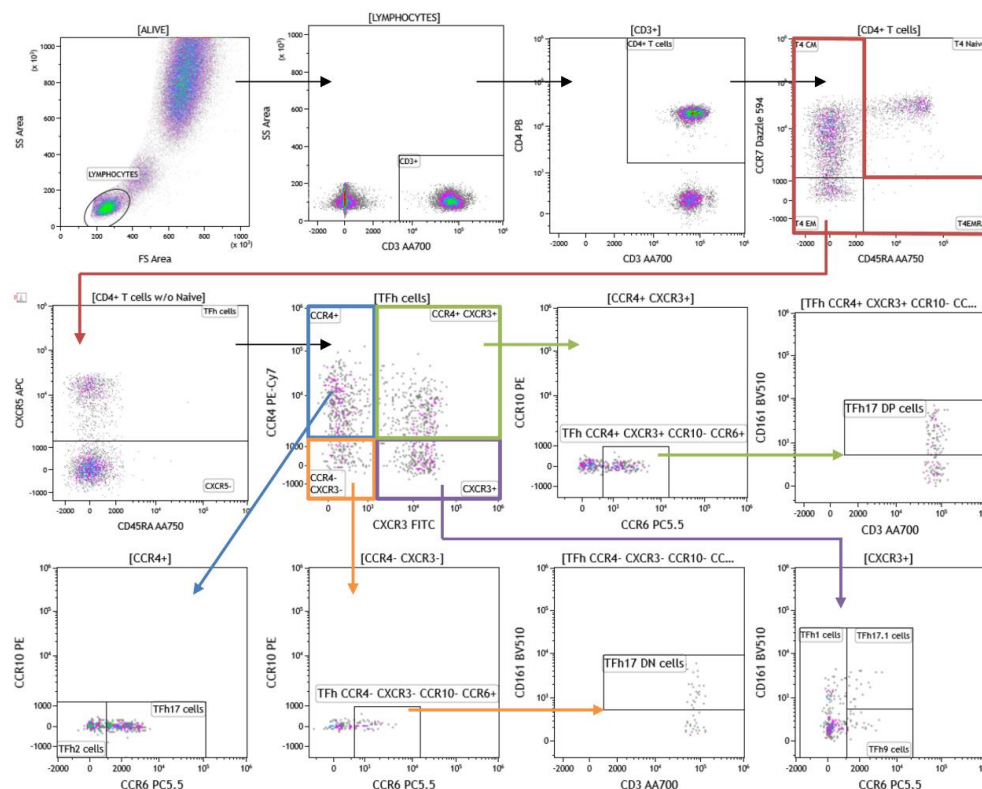

Supplementary Figure S4. Gating strategy for Tfh cells.

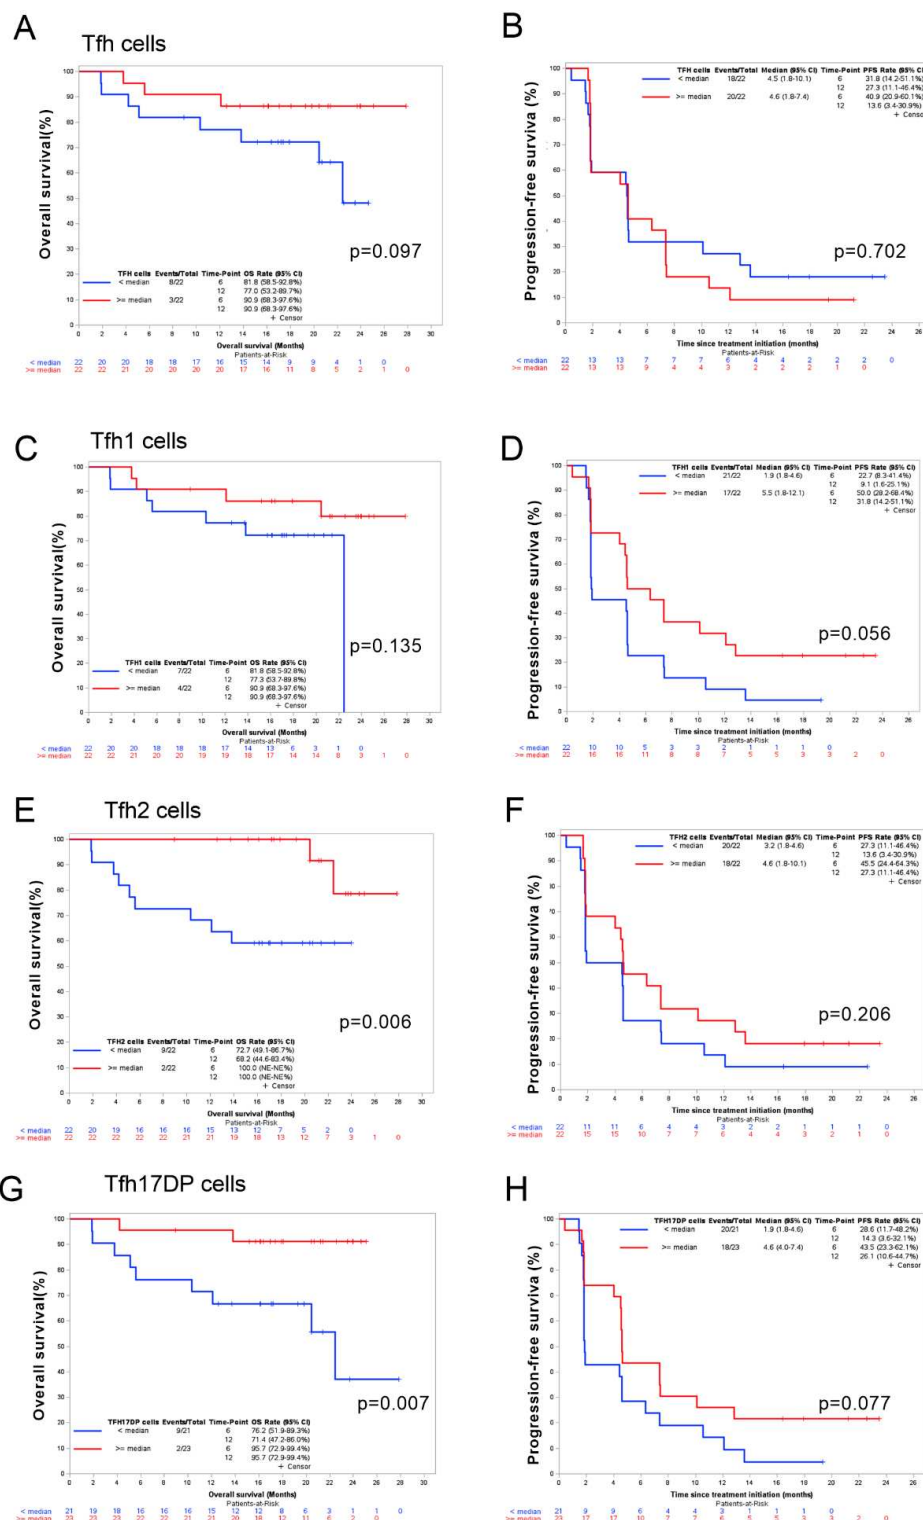

Supplementary Figure S5. (A-B) Kaplan-Meier for OS and PFS according to TFh cells levels (high:  $\geq$ median; low:  $<$ median) in mRCC patients treated with nivolumab. (C-D) Kaplan-Meier for OS and PFS according to Tfh1 cells levels (high:  $\geq$ median; low:  $<$ median) in mRCC patients treated with nivolumab. (E-F) Kaplan-Meier for OS and PFS according to Tfh2 cells levels (high:  $\geq$ median; low:  $<$ median) in mRCC patients treated with nivolumab. (G-H) Kaplan-Meier for OS and PFS according to Tfh17DP cells levels (high:  $\geq$ median; low:  $<$ median) in mRCC patients treated with nivolumab.

Supplementary Table S3. Discovery cohort. Association between soluble factors concentration levels and OS/PFS.

| Cytokines     | Selected threshold       | OS HR (IC95%)<br>p value | PFS HR (IC95%)<br>p value |
|---------------|--------------------------|--------------------------|---------------------------|
| <b>IFN</b>    | Median                   | P= 0.9767                | P=0.9033                  |
| < 6.5         | < median                 | 1                        | 1                         |
| ≥6.5          | ≥median                  | 0.98 (0.28-3.42)         | 1.04 (0.53-2.03)          |
| <b>IL10</b>   | Median                   | P=0.0723                 | P=0.5148                  |
| < 0.4         | < median                 | 1                        | 1                         |
| ≥ 0.4         | ≥ median                 | 3.24 (0.83-12.61)        | 0.80 (0.41-1.59)          |
| <b>IL6</b>    | 3 <sup>rd</sup> quartile | <b>P=0.0112</b>          | P=0.6459                  |
| < 3.8         | < Q3                     | <b>1</b>                 | 1                         |
| ≥3.8          | ≥Q3                      | <b>4.41 (1.26-15.43)</b> | 1.19 (0.55-2.55)          |
| <b>IL7</b>    | Median                   | P=0.4302                 | P=0.1525*                 |
| < 5.9         | < median                 |                          |                           |
| ≥ 5.9         | ≥ median                 | 1.66 (0.47-5.87)         | 1.60 (0.81-3.16)          |
| <b>IL8</b>    | 3 <sup>rd</sup> quartile | P=0.5240                 | P=0.5493                  |
| < 15.9        | < Q3                     | 1                        | 1                         |
| ≥ 15.9        | ≥ Q3                     | 1.55 (0.40-6.05)         | 1.26 (0.57-2.80)          |
| <b>MDC</b>    | 1 <sup>st</sup> quartile | P=0.1283                 | P=0.3263                  |
| < 561         | < Q1                     | 1                        | 1                         |
| ≥ 561         | ≥ Q3                     | 0.39 (0.11-1.38)         | 1.50 (0.64-3.50)          |
| <b>MDC</b>    | Median                   | P=0.7810                 | P=0.1337                  |
| < 636.3       | < median                 | 1                        | 1                         |
| ≥ 636.3       | ≥ median                 | 0.84 (0.24-2.94)         | 1.64 (0.83-3.21)          |
| <b>TNF</b>    | Median                   | P=0.4646                 | P=0.1067                  |
| < 3.4         | < median                 | 1                        |                           |
| ≥ 3.4         | ≥ median                 | 1.61 (0.45-5.81)         | 0.59 (0.30-1.16)          |
| <b>VCAM 1</b> | 3 <sup>rd</sup> quartile | P=0.0714                 | P=0.8266                  |

|                     |                          |                          |                  |
|---------------------|--------------------------|--------------------------|------------------|
| < 638470.3          | < Q3                     | 1                        | 1                |
| ≥ 638470.3          | ≥ Q3                     | 3.16 (0.84-11.84)        | 0.92 (0.42-2.03) |
| <b>VCAM 1</b>       | Median                   | P=0.1973                 | P=0.2766         |
| < 494344.2          | < median                 | 1                        | 1                |
| ≥ 494344.2          | ≥ median                 | 2.39 (0.61-9.39)         | 0.70 (0.36-1.37) |
| <b>VEGF</b>         | 3 <sup>rd</sup> quartile | P=0.6616                 | P=0.0967         |
| < 63.7              | < Q3                     | 1                        | 1                |
| ≥ 63.7              | ≥ Q3                     | 1.36 (0.34-5.36)         | 1.83 (0.86-3.88) |
| <b>BCA-1/CXCL13</b> | 3 <sup>rd</sup> quartile | <b>P=0.0076</b>          | P=0.6285         |
| < 56.3              | < Q3                     | <b>1</b>                 | 1                |
| ≥ 56.3              | ≥ Q3                     | <b>4.74 (1.35-16.64)</b> | 1.21 (0.54-2.68) |
| <b>4 1BB 2</b>      | Median                   | P=0.4302                 | P=0.8037         |
| < 58.4              | < median                 | 1                        | 1                |
| ≥ 58.4              | ≥ median                 | 1.66 (0.47-5.87)         | 0.92 (0.47-1.79) |
| <b>APRIL</b>        | Median                   | P=0.5677                 | P=0.8280         |
| < 4777.9            | < median                 | 1                        | 1                |
| ≥ 4777.9            | ≥ median                 | 0.69 (0.20-2.46)         | 1.07 (0.55-2.10) |
| <b>BAFF</b>         | 3 <sup>rd</sup> quartile | <b>P=0.0114</b>          | P=0.9974         |
| < 1316.6            | < Q3                     | <b>1</b>                 | 1                |
| ≥ 1316.6            | ≥ Q3                     | <b>4.39 (1.26-15.32)</b> | 1.00 (0.45-2.21) |

Supplementary Table S4. Discovery cohort. Association between soluble factors concentration levels and ORR.

|             | Objective Response : complete response |         |     | Patients | Test       |           |
|-------------|----------------------------------------|---------|-----|----------|------------|-----------|
|             | or partial response                    |         |     |          |            |           |
|             | No                                     | YES     |     |          |            |           |
|             | N=32                                   |         | N=7 | N=39     |            |           |
| IFN >= P50  |                                        |         |     |          | Fisher     |           |
| < 6.5       | 15                                     | (46.9%) | 4   | (57.1%)  | 19 (48.7%) | Exact     |
| ≥ 6.5       | 17                                     | (53.1%) | 3   | (42.9%)  | 20 (51.3%) | P = 0.695 |
| IL10 >= P50 |                                        |         |     |          | Fisher     |           |
| < 0.4       | 18                                     | (56.3%) | 2   | (28.6%)  | 20 (51.3%) | Exact     |
| ≥ 0.4       | 14                                     | (43.8%) | 5   | (71.4%)  | 19 (48.7%) | P = 0.235 |
| IL6 >= P75  |                                        |         |     |          | Fisher     |           |
| < 3.8       | 25                                     | (78.1%) | 4   | (57.1%)  | 29 (74.4%) | Exact     |
| ≥ 3.8       | 7                                      | (21.9%) | 3   | (42.9%)  | 10 (25.6%) | P = 0.344 |
| IL7 >= P50  |                                        |         |     |          | Fisher     |           |
| < 5.9       | 15                                     | (46.9%) | 5   | (71.4%)  | 20 (51.3%) | Exact     |
| ≥ 5.9       | 17                                     | (53.1%) | 2   | (28.6%)  | 19 (48.7%) | P = 0.407 |
| IL8 >= P75  |                                        |         |     |          | Fisher     |           |
| < 15.9      | 25                                     | (78.1%) | 5   | (71.4%)  | 30 (76.9%) | Exact     |
| ≥15.9       | 7                                      | (21.9%) | 2   | (28.6%)  | 9 (23.1%)  | P = 0.653 |
| MDC >= P25  |                                        |         |     |          | Fisher     |           |
| < 561       | 9                                      | (28.1%) | 1   | (14.3%)  | 10 (25.6%) | Exact     |
| ≥ 561       | 23                                     | (71.9%) | 6   | (85.7%)  | 29 (74.4%) | P = 0.653 |
| MDC >= P50  |                                        |         |     |          | Fisher     |           |
| < 636.3     | 14                                     | (43.8%) | 5   | (71.4%)  | 19 (48.7%) | Exact     |
| ≥ 636.3     | 18                                     | (56.3%) | 2   | (28.6%)  | 20 (51.3%) | P = 0.235 |
| TNF >= P50  |                                        |         |     |          |            |           |
| < 3.4       | 18                                     | (56.3%) | 2   | (28.6%)  | 20 (51.3%) |           |

|                               | Objective Response : complete response<br>or partial response |           | Patients<br><br>N=39 | Test                         |
|-------------------------------|---------------------------------------------------------------|-----------|----------------------|------------------------------|
|                               | No                                                            | YES       |                      |                              |
|                               | N=32                                                          | N=7       |                      |                              |
| ≥ 3.4                         | 14 (43.8%)                                                    | 5 (71.4%) | 19 (48.7%)           | Fisher<br>Exact<br>P = 0.235 |
| <b>VCAM 1 &gt;= P75</b>       |                                                               |           |                      | Fisher                       |
| < 638470.3                    | 26 (81.3%)                                                    | 3 (42.9%) | 29 (74.4%)           | Exact                        |
| ≥ 638470.3                    | 6 (18.8%)                                                     | 4 (57.1%) | 10 (25.6%)           | P = 0.057                    |
| <b>VCAM 1 &gt;= P50</b>       |                                                               |           |                      | Fisher                       |
| < 494344.2                    | 17 (53.1%)                                                    | 2 (28.6%) | 19 (48.7%)           | Exact                        |
| ≥ 494344.2                    | 15 (46.9%)                                                    | 5 (71.4%) | 20 (51.3%)           | P = 0.407                    |
| <b>VEGF &gt;= P75</b>         |                                                               |           |                      | Fisher                       |
| < 63.7                        | 23 (71.9%)                                                    | 6 (85.7%) | 29 (74.4%)           | Exact                        |
| ≥ 63.7                        | 9 (28.1%)                                                     | 1 (14.3%) | 10 (25.6%)           | P = 0.653                    |
| <b>BCA-1/CXCL13 &gt;= P75</b> |                                                               |           |                      | Fisher                       |
| < 56.3                        | 24 (75.0%)                                                    | 5 (71.4%) | 29 (74.4%)           | Exact                        |
| ≥ 56.3                        | 8 (25.0%)                                                     | 2 (28.6%) | 10 (25.6%)           | P = 1.000                    |
| <b>4 1BB 2 &gt;= P50</b>      |                                                               |           |                      | Fisher                       |
| < 58.4                        | 17 (53.1%)                                                    | 3 (42.9%) | 20 (51.3%)           | Exact                        |
| ≥ 58.4                        | 15 (46.9%)                                                    | 4 (57.1%) | 19 (48.7%)           | P = 0.695                    |
| <b>APRIL &gt;= P50</b>        |                                                               |           |                      | Fisher                       |
| < 4777.9                      | 16 (50.0%)                                                    | 3 (42.9%) | 19 (48.7%)           | Exact                        |
| ≥ 4777.9                      | 16 (50.0%)                                                    | 4 (57.1%) | 20 (51.3%)           | P = 1.000                    |
| <b>BAFF &gt;= P75</b>         |                                                               |           |                      | Fisher                       |
| < 1316.6                      | 23 (71.9%)                                                    | 6 (85.7%) | 29 (74.4%)           | Exact                        |
| ≥ 1316.6                      | 9 (28.1%)                                                     | 1 (14.3%) | 10 (25.6%)           | P = 0.653                    |
| <b>SDF &gt;302</b>            |                                                               |           |                      |                              |

|                       | Objective Response : complete response<br>or partial response |            | Patients<br><br>N=39 | Test      |
|-----------------------|---------------------------------------------------------------|------------|----------------------|-----------|
|                       | No<br>N=32                                                    | YES<br>N=7 |                      |           |
|                       |                                                               |            |                      |           |
| < Detection threshold | 17 (53.1%)                                                    | 5 (71.4%)  | 22 (56.4%)           | Fisher    |
| > Detection threshold | 15 (46.9%)                                                    | 2 (28.6%)  | 17 (43.6%)           | Exact     |
|                       |                                                               |            |                      | P = 0.438 |
