# Supplementary figures and images for: Baseline circulating unswitched memory B cells and B-cell related soluble factors are associated with overall survival in patients with clear cell renal cell carcinoma treated with nivolumab within the NIVOREN GETUG-AFU 26 study
Source: HighWire-hosted journal article supplement (doi:10.1136/jitc-2022-004885), 2022-05-01

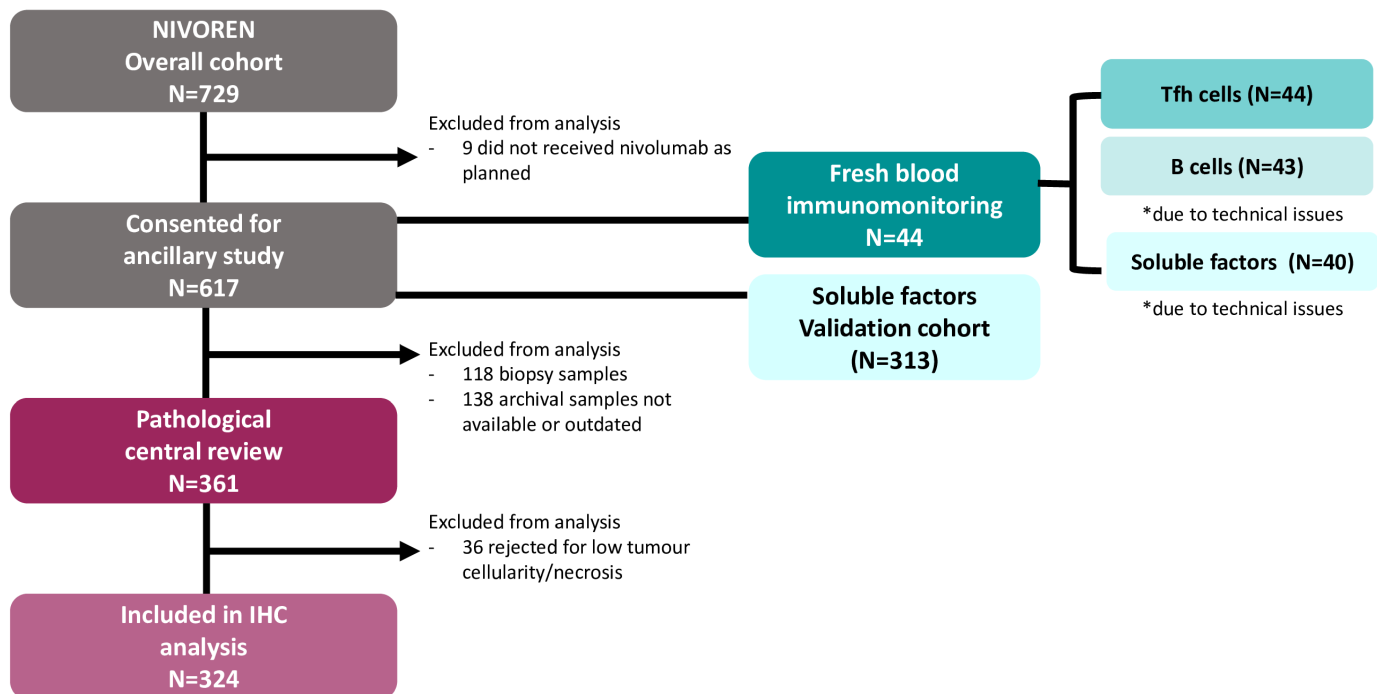

Supplement: jitc-2022-004885supp002_data_supplement.pdf [file jitc-2022-004885supp002_data_supplement.pdf]

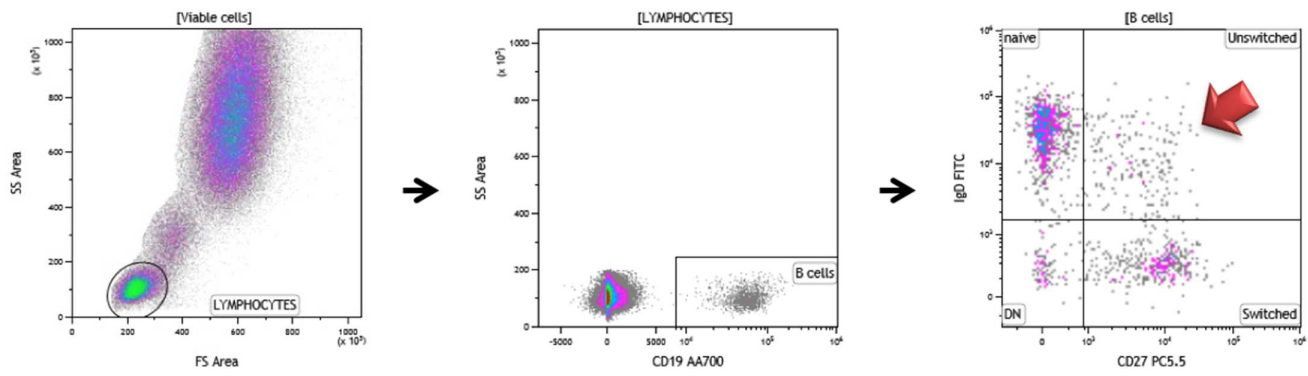

Supplement: jitc-2022-004885supp003_data_supplement.pdf [file jitc-2022-004885supp003_data_supplement.pdf]

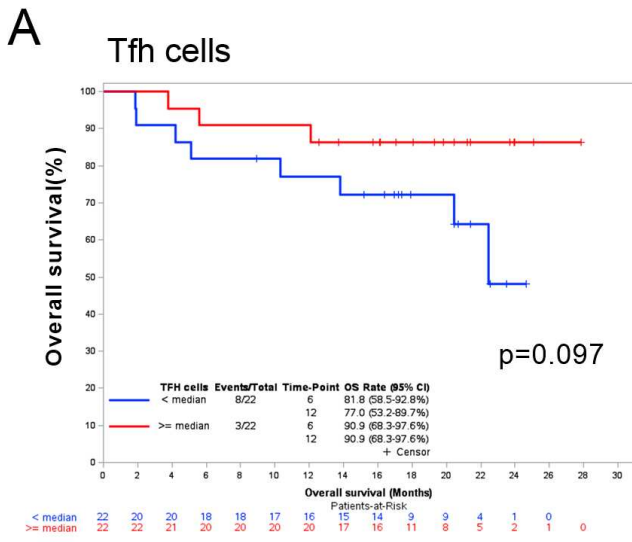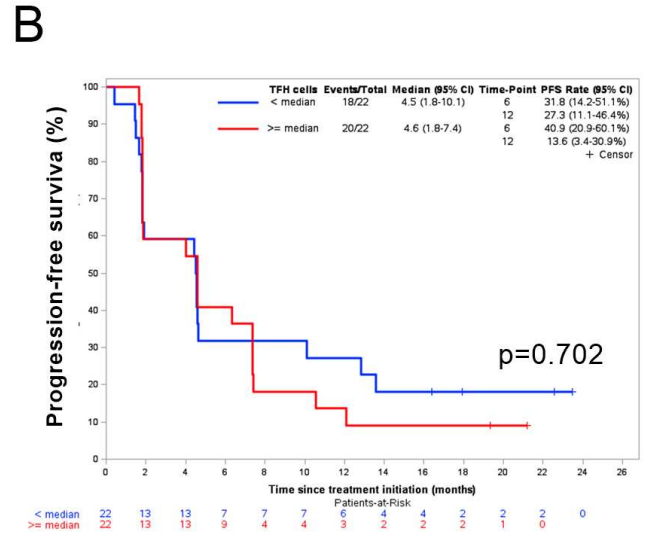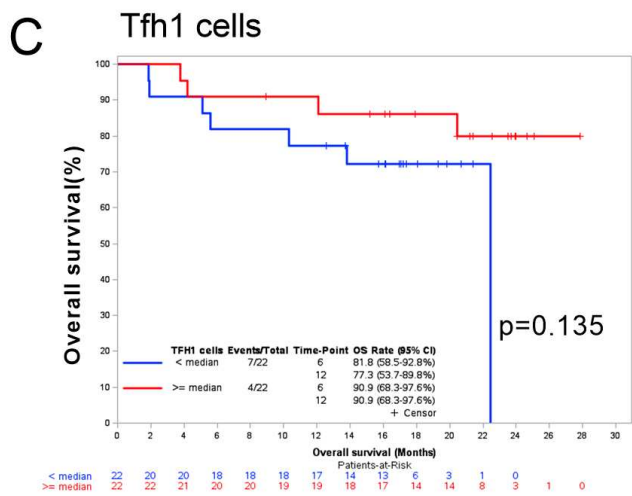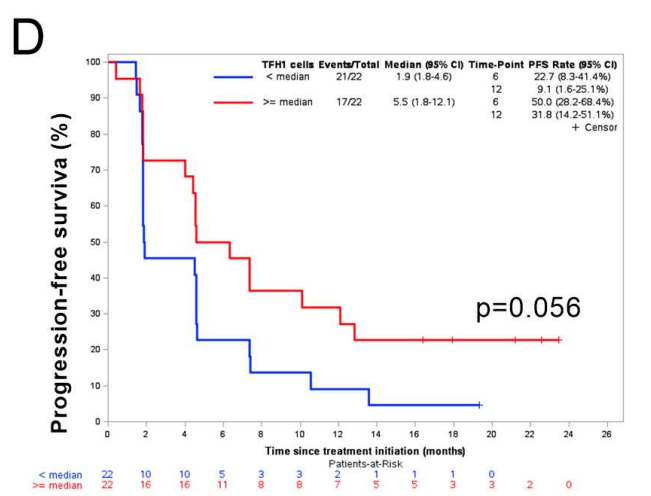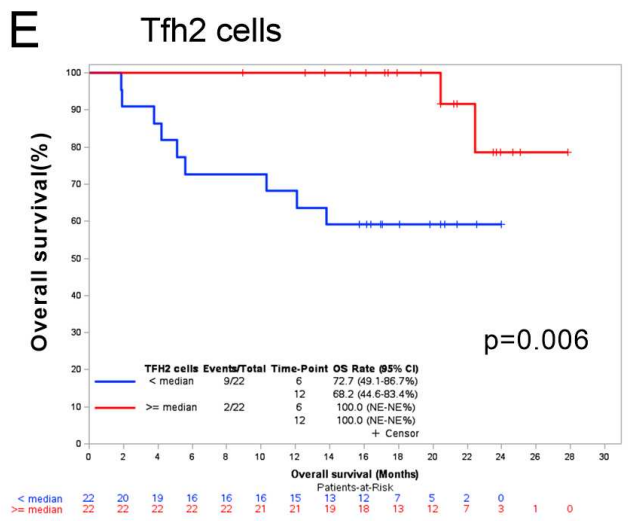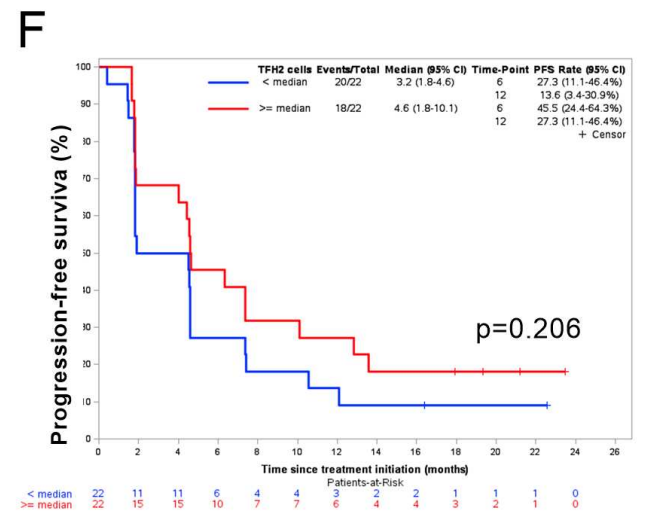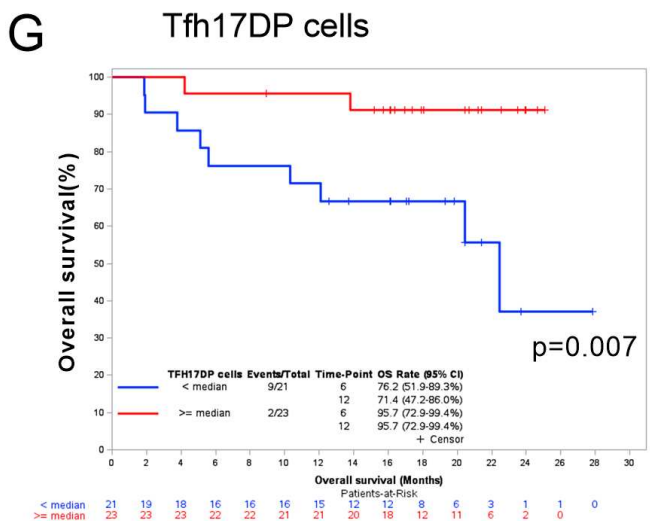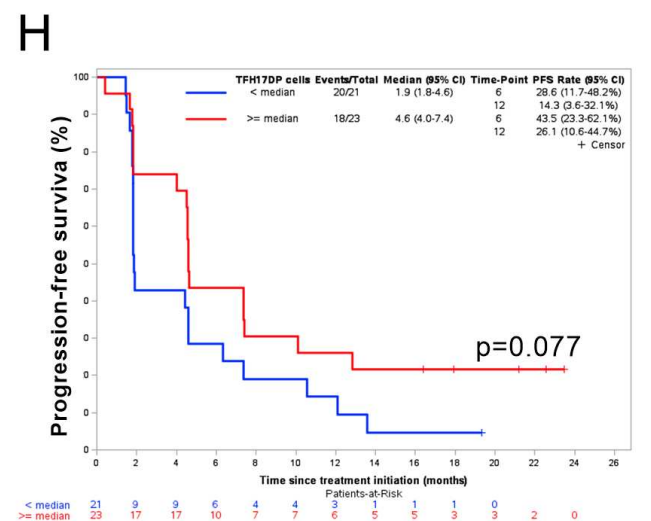

Supplement: jitc-2022-004885supp006_data_supplement.pdf [file jitc-2022-004885supp006_data_supplement.pdf]
